# Supplementary material
Source: Springer Nature journal article supplement (https://www.springermedizin.de/resource/supplementary/12889_2009_2370_MOESM3_ESM.pdf/9485572)
Supplement: MOESM3 [file 9485572]

No. citations after  
duplicates removed  
**2400**

→ **1219** excluded by  
title

→ **964** excluded after  
abstract appraisal

Full text papers  
obtained  
**217**

→ **178** excluded after  
full text appraisal

→ **16** reviews

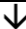

← **1** additional paper  
from reviews

Included for data  
extraction  
**24**
